# Supplementary material for: The Outcomes of Coronary Artery Bypass Surgery after 18 Months—Is There an Influence of the Initial Right Ventricle Diastolic Dysfunction?
Source: MDPI journal article supplement (doi:10.3390/jcdd10010018), 2023-01-04
Supplement: s1 [file s1]

Supplementals

# The Outcomes of Coronary Artery Bypass Surgery after 18 Months—Is There an Influence of the Initial Right Ventricle Diastolic Dysfunction?

Alexey N. Sumin \*, Anna V. Shcheglova, Ekaterina V. Korok and Tatjana Ju. Sergeeva

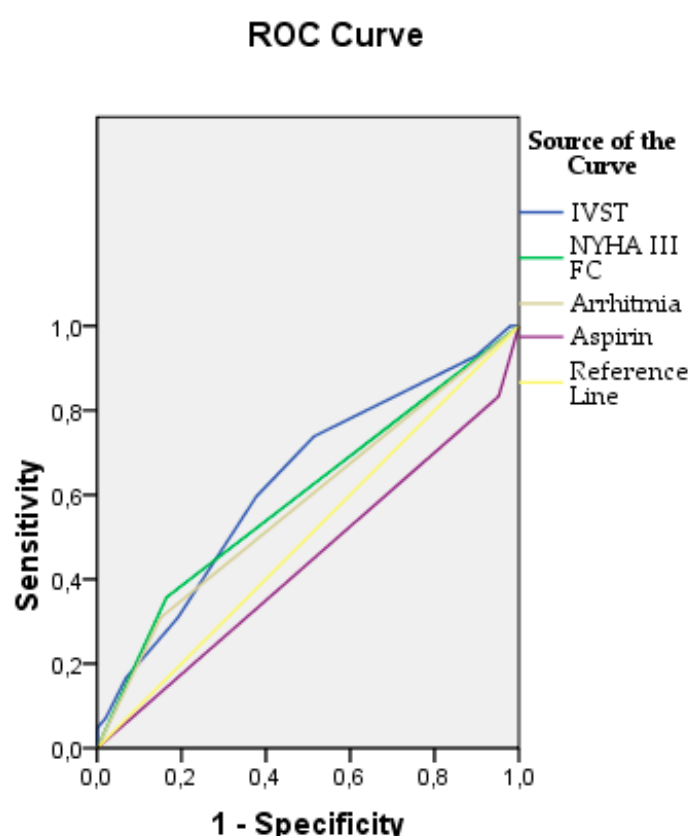

**Figure S1.** Receiver operating characteristic curve analysis. Performance of preoperative parameters in discriminating the risk of MACE development 18 months after CABG. Notes: ROC, receiver operating characteristic; IVST, thickness of the interventricular septum; NYHA, New York Heart Association; FC, functional class.

**Table S1.** Demographic data and clinical characteristics of patients with and without unfavorable outcome 18 months after CABG.

| Characteristics              | Group 1<br>Without<br>unfavorable<br>outcome<br>(n = 146) | Group 2<br>With unfavorable<br>outcome<br>(n = 43) | p |
|------------------------------|-----------------------------------------------------------|----------------------------------------------------|---|
| Clinical and anamnestic data |                                                           |                                                    |   |

|                                                    |                    |                   |       |
|----------------------------------------------------|--------------------|-------------------|-------|
| Male, n (%)                                        | 111 (76.03)        | 34 (79.07)        | 0.678 |
| Age, ME [LQ, UQ] (y)                               | 64.0 [60.0;68.0]   | 64.0 [62.0;69.0]  | 0.361 |
| Body mass index, ME [LQ, UQ] (kg/m <sup>2</sup> )  | 28.54 [25.6;30.78] | 28.71 [26.7;31.2] | 0.768 |
| Smoking, n (%)                                     | 42 (29.58)         | 15 (34.88)        | 0.509 |
| Hypertension, n (%)                                | 138 (94.52)        | 41 (95.35)        | 0.831 |
| Angina pectoris, n (%)                             | 129 (88.36)        | 36 (83.72)        | 0.422 |
| Myocardial infarction history, n (%)               | 93 (63.7)          | 28 (65.12)        | 0.864 |
| Rhythm disturbances, n (%)                         | 22 (15.07)         | 13 (30.2)         | 0.019 |
| Diabetes mellitus, n (%)                           | 34 (23.29)         | 16 (37.21)        | 0.068 |
| Stroke history, n (%)                              | 11 (7.53)          | 6 (13.95)         | 0.195 |
| PCI history, n (%)                                 | 27 (18.49)         | 7 (16.28)         | 0.739 |
| CHF NYHA III FC, n (%)                             | 24 (16.44)         | 15 (34.88)        | 0.008 |
| Carotid atherosclerosis >50%, n (%)                | 28 (19.18)         | 8 (18.6)          | 0.932 |
| Hyperlipidemia, n (%)                              | 95 (65.07)         | 28 (65.12)        | 0.995 |
| Therapy before surgery                             |                    |                   |       |
| Betablocker, n (%)                                 | 38 (88.37)         | 136 (93.15)       | 0.308 |
| Statins, n (%)                                     | 40 (93.02)         | 141 (96.58)       | 0.309 |
| Calcium-channel blockers, n (%)                    | 36 (83.72)         | 102 (69.86)       | 0.071 |
| ACE-I, n (%)                                       | 33 (76.74)         | 112 (76.71)       | 0.995 |
| Aspirin, n (%)                                     | 36 (83.72)         | 139 (95.21)       | 0.011 |
| Surgical procedure                                 |                    |                   |       |
| Ventriculoplasty, n (%)                            | 13 (8.9)           | 3 (6.98)          | 0.689 |
| Thrombectomy, n (%)                                | 8 (4.48)           | 1 (2.33)          | 0.393 |
| Radiofrequency ablation, n (%)                     | 4 (2.74)           | 1 (2.33)          | 0.881 |
| Carotid endarterectomy, n (%)                      | 15 (10.27)         | 6 (13.95)         | 0.499 |
| Bypass graft number, ME [LQ, UQ]                   | 3 [2.0;3.0]        | 3 [2.0;3.0]       | 0.327 |
| Cardiopulmonary bypass duration, ME [LQ; UQ] (min) | 76.0 [65.0;90.0]   | 82.0 [70.0;98.0]  | 0.199 |
| Aortic cross-clamp time, ME [LQ; UQ] (min)         | 50.0 [40.0;62.0]   | 53.0 [41.0;61.0]  | 0.674 |

CHF, chronic heart failure; NYHA, New York Heart Association; FC, functional class; PCI, percutaneous coronary intervention; ACE-I, angiotensin-converting enzyme inhibitor.

**Table S2.** LV indicators before surgery in patients with and without unfavorable outcome 18 months after CABG.

| Characteristics                             | Group 1<br>Without adverse<br>outcome<br>(n = 146) | Group 2<br>With adverse<br>outcome<br>(n = 43) | P     |
|---------------------------------------------|----------------------------------------------------|------------------------------------------------|-------|
| Structural indicators and systolic function |                                                    |                                                |       |
| Aorta, mm ME [LQ, UQ]                       | 3.5 [3.3;3.8]                                      | 3.6 [3.4;3.8]                                  | 0.618 |
| LA, ME [LQ; UQ] mm                          | 4.4 [4.1;4.7]                                      | 4.6 [4.2;5.0]                                  | 0.143 |
| EDD, ME [LQ; UQ] mm                         | 5.5 [5.2;6.1]                                      | 5.6 [5.3;6.1]                                  | 0.469 |
| ESD LV, ME [LQ;UQ] mm                       | 3.6 [3.3;4.0]                                      | 3.8 [3.4;4.2]                                  | 0.304 |
| EDV, ME [LQ;UQ] mL                          | 147.0 [130.0;187.0]                                | 154.0 [135.0;187.0]                            | 0.156 |
| ESV, ME [LQ;UQ] mL                          | 51.0 [42.0;70.0]                                   | 62.0 [47.0;78.0]                               | 0.479 |
| LVEF, ME [LQ;UQ] %                          | 61.0 [54.0;66.0]                                   | 60.0 [55.0;65.0]                               | 0.388 |
| SV, ME [LQ, UQ], mL                         | 160.0 [135.0;190.5]                                | 147.0 [124.0;187.0]                            | 0.301 |
| LVM, ME [LQ;UQ] (g)                         | 302.9 [242.1;357.2]                                | 328.5 [276.3;391.1]                            | 0.121 |

|                                     |                     |                     |       |
|-------------------------------------|---------------------|---------------------|-------|
| LVMI, ME [LQ;UQ]                    | 146.8 [128.0;180.4] | 177.4 [143.6;197.7] | 0.132 |
| IVST ME [LQ, UQ] cm                 | 1.1 [1.0;1.2]       | 1.2 [1.0;1.3]       | 0.008 |
| PW LV, ME [LQ, UQ] cm               | 1.0 [1.0;1.2]       | 1.2 [1.0;1.3]       | 0.023 |
| Indicators of LV diastolic function |                     |                     |       |
| IVRT, ME[LQ;UQ] m/s                 | 92.0 [90.0;98.0]    | 92.0 [90.0;98.0]    | 0.176 |
| E, cm/sME [LQ, UQ]                  | 58.0 [46.0;68.0]    | 56.0 [44.0;66.0]    | 0.458 |
| A, cm/s ME [LQ, UQ]                 | 66.5 [57.0;78.0]    | 71.0 [63.0;78.0]    | 0.212 |
| E/A                                 | 0.8 [0.66;1.17]     | 0.76 [0.66;0.87]    | 0.152 |
| e', cm/s, ME [LQ, UQ]               | 9.4 [8.0;11.0]      | 8.4 [7.1;10.6]      | 0.007 |
| a', cm/sME [LQ, UQ]                 | 9.8 [8.3;11.6]      | 10.6 [9.2;11.6]     | 0.216 |
| e'/a', ME [LQ, UQ]                  | 0.92 [0.72;1.29]    | 0.75 [0.66;1.14]    | 0.05  |
| s', cm/s ME [LQ, UQ]                | 9.2 [8.2;10.2]      | 8.8 [7.7;10.6]      | 0.619 |
| E/e', ME [LQ, UQ]                   | 6.0 [4.75;7.56]     | 6.39 [5.28;7.6]     | 0.595 |
| Tei LV [LQ;UQ]                      | 0.33 [0.25;0.43]    | 0.32 [0.25;0.39]    | 0.493 |

Continuous data are presented as the median [lower quartile, upper quartile]. EDD—end-diastolic dimension; EDVI—end-diastolic volume index; EF—ejection fraction; LA—left atrium; LVMI—left ventricular mass index; ESV—end-systolic volume; ESD—end-systolic dimension; IVRT—iso-volumic relaxation time; IVST—interventricular septum thickness; PW LV—posterior wall of the left ventricle; E—peak early diastolic left ventricular filling velocity; A—peak left ventricular filling velocity at atrial contraction; E/A—ratio of peak early diastolic filling velocity to peak filling velocity at atrial contract; e'—early diastolic mitral annular tissue velocity; a'—late diastolic mitral annular tissue velocity; e'/a'—ratio of the velocities of early and late movements of the mitral annulus; s'—systolic mitral annular tissue velocity; E/e'—ratio of the early diastolic velocity of mitral inflow to the early diastolic velocity of mitral annular motion; Tei LV—myocardial performance index left ventricular.

**Table S3.** Indicators of the right ventricle before surgery in patients with and without unfavorable outcome 18 months after CABG.

| Characteristics                                | Group 1<br>Without adverse<br>outcome<br>(n = 146) | Group 2<br>With adverse<br>outcome<br>(n = 43) | p     |
|------------------------------------------------|----------------------------------------------------|------------------------------------------------|-------|
| Structural indicators and systolic function    |                                                    |                                                |       |
| RV, [LQ; UQ] mm                                | 2.0 [1.9;2.2]                                      | 2.1 [1.8;2.3]                                  | 0.348 |
| RVth, [LQ; UQ] mm                              | 0.4 [0.3;0.4]                                      | 0.4 [0.3;0.4]                                  | 0.266 |
| TAPSE, [LQ, UQ] mm                             | 23.0 [20.0;26.0]                                   | 22.0 [21.0;26.0]                               | 0.851 |
| RVEF, ME [LQ;UQ] %                             | 55.0 [52.0;57.0]                                   | 55.0 [53.0;57.0]                               | 0.577 |
| RA, ME [LQ; UQ] mm                             | 40.0 [32.0;49.0]                                   | 40.0 [34.0;50.0]                               | 0.721 |
| mPAP, [LQ; UQ] mmhg                            | 12.0 [11.0;13.0]                                   | 12.0 [11.0;16.0]                               | 0.506 |
| sPAP, [LQ; UQ] mmhg                            | 25.0 [23.5;28.0]                                   | 28.0 [25.0;30.0]                               | 0.051 |
| Indicators of diastolic function               |                                                    |                                                |       |
| E <sub>t</sub> , ME [LQ, UQ] cm/s              | 45.0 [37.5;50.]                                    | 41.0 [36.0;49.0]                               | 0.205 |
| A <sub>t</sub> , ME [LQ, UQ] cm/s              | 42.0 [34.0;49.0]                                   | 43.0 [37.0;50.0]                               | 0.383 |
| E <sub>t</sub> /A <sub>t</sub>                 | 1.13 [0.78;1.38]                                   | 0.88 [0.74;1.28]                               | 0.173 |
| e' <sub>t</sub> , ME [LQ, UQ] cm/s             | 9.5 [8.3;11.2]                                     | 9.4 [8.0;11.6]                                 | 0.822 |
| a' <sub>t</sub> , ME [LQ, UQ] cm/s             | 14.0 [12.1;15.8]                                   | 14.0 [12.0;16.8]                               | 0.947 |
| e' <sub>t</sub> /a' <sub>t</sub> , ME [LQ, UQ] | 0.69 [0.59;0.78]                                   | 0.71 [0.58;0.81]                               | 0.772 |
| s' <sub>t</sub> , ME [LQ, UQ] cm/s             | 13.2 [11.85;14.9]                                  | 13.0 [11.9;14.3]                               | 0.649 |
| E <sub>t</sub> /e' <sub>t</sub> , ME [LQ, UQ]  | 4.54 [3.65;5.58]                                   | 4.4 [3.1;5.33]                                 | 0.505 |
| RV Tei index [LQ; UQ]                          | 0.3 [0.22;0.38]                                    | 0.3 [0.24;0.37]                                | 0.983 |
| RVDD, n (%)                                    | 61 (41.8)                                          | 22 (51.2)                                      | 0.353 |

|                               |           |           |       |
|-------------------------------|-----------|-----------|-------|
| - impaired relaxation, n (%)  | 40 (27.4) | 15 (34.9) | 0.342 |
| - pseudonormal filling, n (%) | 21 (14.4) | 7 (16.3)  | 0.758 |

Continuous data are presented as the median [lower quartile, upper quartile]. RV—right ventricular; mPAP—mean pulmonary arterial pressure; sPAP—systolic pulmonary arterial pressure; TAPSE—tricuspid annular plane systolic excursion; Tei—myocardial performance index; RVth—thickness of right ventricular wall in diastole; EF—ejection fraction; RA—right atrium; Et—early transtricuspid diastolic filling; At—late transtricuspid mitral diastolic filling; e't—early diastolic tricuspid annular tissue velocity; a't—late diastolic tricuspid annular tissue velocity; e't/a't—ratio of early diastolic tricuspid annular tissue velocity to the late diastolic tricuspid annular tissue velocity; s't—systolic tricuspid annular tissue velocity; Et/e't—ratio of early transtricuspid diastolic filling to the early diastolic tricuspid annular tissue velocity; RVDD—right ventricular diastolic dysfunction; RVSD—right ventricular systolic dysfunction.

**Table S4.** Area Under the Receiver Operating Characteristic Curve (Performance of Preoperative Parameters in Discriminating the Risk of MACE Development 18 months after CABG).

| Test Result Variable(s)    | Area  | Std. Error <sup>a</sup> | Asymptotic Sig. <sup>b</sup> | Asymptotic 95% Confidence Interval |             |
|----------------------------|-------|-------------------------|------------------------------|------------------------------------|-------------|
|                            |       |                         |                              | Lower Bound                        | Upper Bound |
| PCI                        | 0.461 | 0.067                   | 0.577                        | 0.330                              | 0.592       |
| Peripheral atherosclerosis | 0.593 | 0.074                   | 0.185                        | 0.447                              | 0.739       |
| IVST                       | 0.606 | 0.073                   | 0.129                        | 0.464                              | 0.749       |
| Et/e't                     | 0.638 | 0.070                   | 0.048                        | 0.501                              | 0.776       |
| LVEF                       | 0.303 | 0.052                   | 0.005                        | 0.202                              | 0.404       |

The test result variable(s): PCI, Peripheral arterosclerosis, IVS, Et/e't, LVEF has at least one tie between the positive actual state group and the negative actual state group; a. Under the nonparametric assumption; b. Null hypothesis: true area = 0.5; PCI, percutaneous coronary intervention; IVST, interventricular septum thickness; Et/e't, ratio of early transtricuspid diastolic filling to the early diastolic tricuspid annular tissue velocity; LVEF, left ventricular ejection fraction.

**Table S5.** Area Under the Receiver Operating Characteristic Curve (Performance of Preoperative Parameters in Discriminating the Risk of unfavorable outcome (MACE + cardiovascular hospitalization) 18 months after CABG).

| Test Result Variable(s) | Area  | Std. Error <sup>a</sup> | Asymptotic Sig. <sup>b</sup> | Asymptotic 95% Confidence Interval |             |
|-------------------------|-------|-------------------------|------------------------------|------------------------------------|-------------|
|                         |       |                         |                              | Lower Bound                        | Upper Bound |
| IVST                    | 0.631 | 0.049                   | 0.010                        | 0.535                              | 0.727       |
| NYHA III FC             | 0.596 | 0.052                   | 0.057                        | 0.494                              | 0.699       |
| Arrhythmia              | 0.579 | 0.052                   | 0.117                        | 0.477                              | 0.682       |
| Aspirin                 | 0.441 | 0.053                   | 0.241                        | 0.337                              | 0.544       |

The test result variable(s): IVS, NYHA III FK, Arrhythmia, Aspirin has at least one tie between the positive actual state group and the negative actual state group; a. Under the nonparametric assumption; IVST, interventricular septum thickness; NYHA, New York Heart Association; FC, functional class.
